# Supplementary material for: Manganese oxide phases and morphologies: A study on calcination temperature and atmospheric dependence
Source: publisher site journal article supplement (doi:10.3762/bjnano.6.6), 2015-01-06
Supplement: Additional file 1 [file 2190-4286-6-6-S1.pdf]

# Supporting Information

for

## **Manganese oxide phases and morphologies: A study on calcination temperature and atmospheric dependence**

Matthias Augustin\*<sup>1,2</sup>, Daniela Fenske<sup>1</sup>, Ingo Bardenhagen<sup>1</sup>, Anne Westphal<sup>1</sup>, Martin Knipper<sup>2</sup>, Thorsten Plaggenborg<sup>2</sup>, Joanna Kolny-Olesiak<sup>2</sup>, and Jürgen Parisi<sup>2</sup>

Address: <sup>1</sup>Fraunhofer Institute for Manufacturing Technology and Advanced Materials, Wiener Str. 12, 28359 Bremen, Germany and <sup>2</sup>Department of Physics, Energy and Semiconductor Research Laboratory, Carl von Ossietzky University of Oldenburg, 26129 Oldenburg, Germany

Email: Matthias Augustin\* - [matthias.augustin@ifam.fraunhofer.de](mailto:matthias.augustin@ifam.fraunhofer.de)

\* Corresponding author

## Additional XRD experimental data.

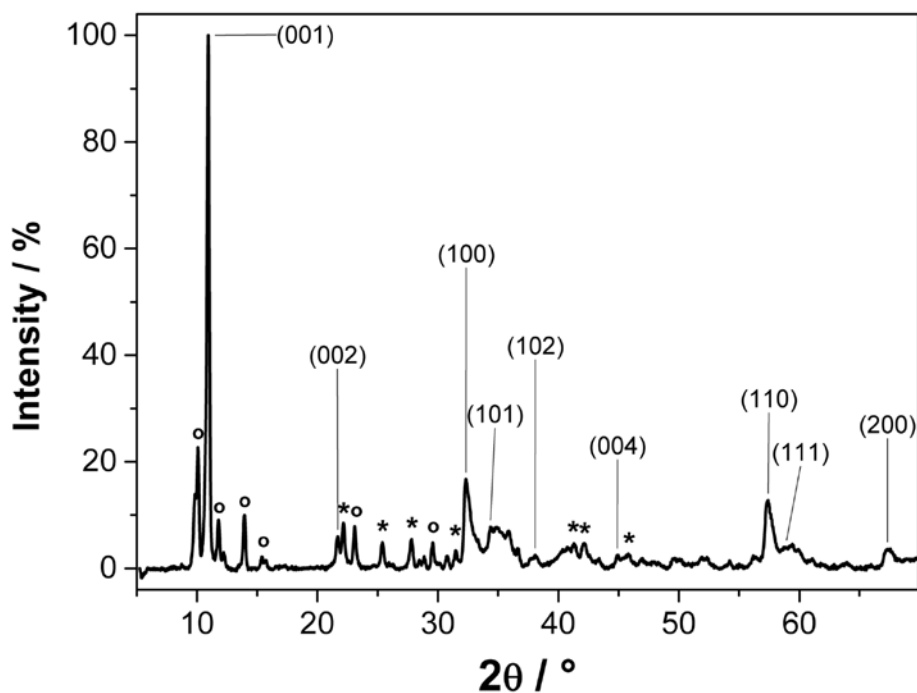

**Figure S1:** Powder XRD pattern of Mn(II) glycolate particles after 1 h of synthesis at 170°C; labels denote reflections assigned to manganese glycolate, circles and asterisks denote reflections of manganese acetate dihydrate (ICDD 00-056-0183) and the side product manganese oxalate (ICDD 00-032-0646), respectively.

The in situ XRD patterns depicted in Figure S2 were recorded to investigate the time-dependent oxidation of  $\text{Mn}_3\text{O}_4$  (reflection at  $18.0^\circ$ , \*) [36] to  $\text{Mn}_5\text{O}_8$  (reflections at  $18.1^\circ$  and  $21.6^\circ$ , +) [31]. Therefore, after initially heating Mn(II) glycolate up to  $400^\circ\text{C}$  in an  $\text{O}_2$  flow at 18 K/min the temperature was kept constant for 350 min. The reflection at  $18.0^\circ$  and the absence of a reflection at  $21.5^\circ$  indicate an already completed oxidation of Mn(II) glycolate to  $\text{Mn}_3\text{O}_4$  at the start of the measurement. The  $\text{Mn}_5\text{O}_8$  reflection at  $21.6^\circ$  appears after about 40 min of the measurement. The

slow oxidation process of  $\text{Mn}_3\text{O}_4$  to  $\text{Mn}_5\text{O}_8$  can also be observed by the decreased intensity as well as a broadening of the reflection at  $18.0^\circ$  up to  $18.1^\circ$  due to an overlap of the  $\text{Mn}_3\text{O}_4$  and  $\text{Mn}_5\text{O}_8$  reflections until about 150 min of the measurement, when the reflection at  $18.0^\circ$  disappears. For the subsequent 200 min of the measurement, the reflection is detected constantly at  $18.1^\circ$  indicating the end of the oxidation process, which was also observed in the temperature-dependent in situ XRD measurements as a slow process from about  $350^\circ\text{C}$  to about  $440^\circ\text{C}$  (compare with Figure 3). Although the background reflections of the in situ XRD patterns depicted in Figures 3 and S2 increase with increasing  $2\theta$ , the strong  $\alpha\text{-Mn}_2\text{O}_3$  reflection at  $23.2^\circ$  is observed in the temperature-dependent in situ XRD measurements (see Figure 3) but not in the time-dependent measurements at  $400^\circ\text{C}$ . This result is contrary to that reported by Dimesso et al. [28], who observed the formation of  $\alpha\text{-Mn}_2\text{O}_3$  during thermal treatment at  $400^\circ\text{C}$  in the presence of  $\text{O}_2$  for more than 5 h. Our results show that by calcination at  $400^\circ\text{C}$  in an  $\text{O}_2$  flow for a time between 150 and 300 min,  $\text{Mn}_5\text{O}_8$  is at least the major, if not the only species present, without any indication of the formation of  $\alpha\text{-Mn}_2\text{O}_3$ . After heating at  $400^\circ\text{C}$  for more than 300 min in  $\text{O}_2$  atmosphere,  $\text{Mn}_5\text{O}_8$  is the only manganese oxide phase in the product, which was shown by X-ray diffraction after calcination (compare to Figure 5).

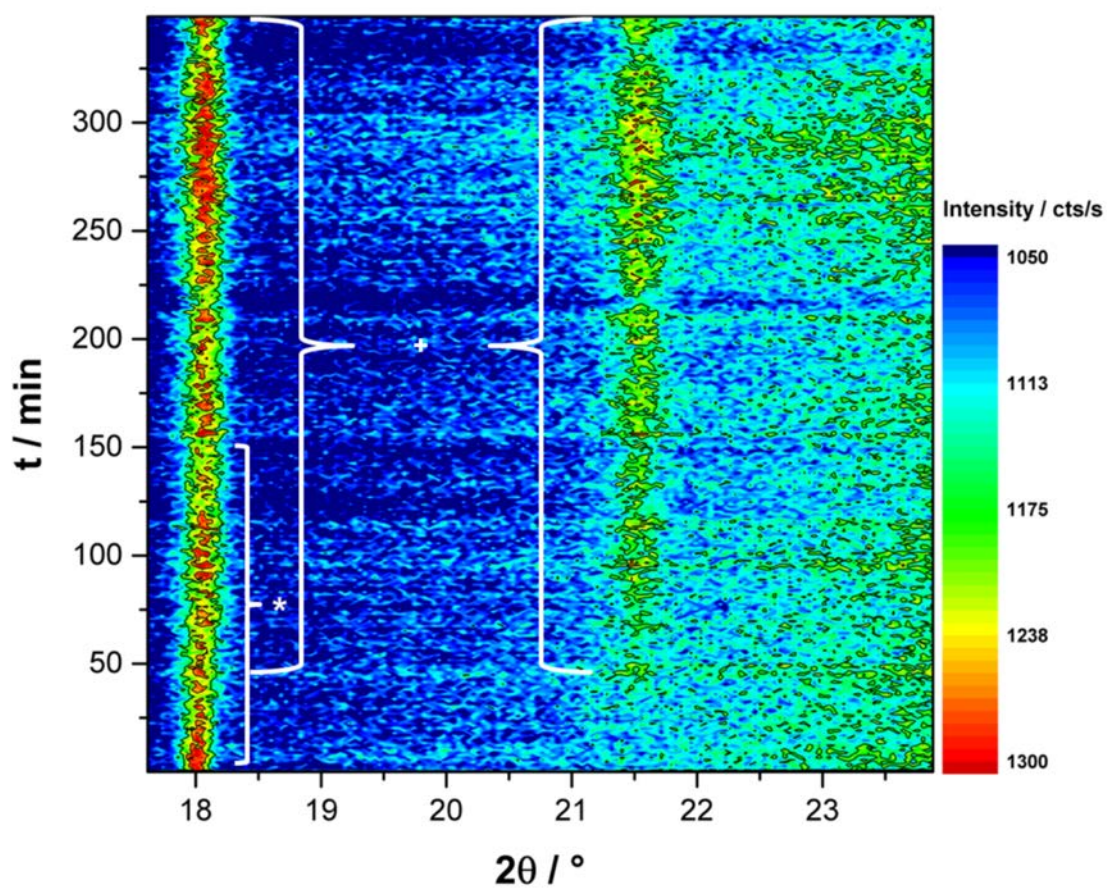

**Figure S2:** In situ XRD patterns of the Mn(II) glycolate particles heated for 350 min at 400°C in a pure O<sub>2</sub> flow; reflexes denoted are: Mn<sub>3</sub>O<sub>4</sub> (\*) and Mn<sub>5</sub>O<sub>8</sub> (+).
